# Supplementary material for: Whole Exome Sequencing to Find Candidate Variants for the Prediction of Kidney Transplantation Efficacy
Source: Genes (Basel). 2023 Jun 11;14(6):1251. doi: 10.3390/genes14061251 (PMC10298443; doi:10.3390/genes14061251)
Supplement: Supplementary file 1 [file genes-14-01251-s001.zip]

Archive with 21 entries (21 files):
- # 1.vcf
- # 10.vcf
- # 2.vcf
- # 3.vcf
- # 4.vcf
- # 5.vcf
- # 6.vcf
- # 7.vcf
- # 8.vcf
- # 9.vcf
- HGV # 10.xlsx
- HGV #1.xlsx
- HGV #2.xlsx
- HGV #3.xlsx
- HGV #4.xlsx
- HGV #5.xlsx
- HGV #6.xlsx
- HGV #7.xlsx
- HGV #8.xlsx
- HGV #9.xlsx
- Submission_statement_EVA (1).pdf
